# Supplementary material for: Metallo-phosphorylation of olefins: reaction of diethyl chlorophosphate with zirconocene–ethylene complexElectronic supplementary data available: experimental procedure and NMR data. See http://www.rsc.org/suppdata/cc/b1/b107755d/
Source: Royal Society of Chemistry journal article supplement (doi:10.1039/b107755d), 2001-11-09
Supplement: b107755d.doc [file b107755d.doc]

# Supplementary Material

*for*

Metallo-Phosphorylation of Olefins: Reaction of Diethyl Chlorophosphate

with Zirconocene-Ethylene Complex

# Chanjuan Xi,* Mingming Ma, Xiaodong Li

Key Laboratory for Bioorganic Phosphorus Chemistry of Ministry of Education, Department of Chemistry, Tsinghua University, Beijing, 100084

Experimental Procedures and NMR data:

**General:** All reactions were run under nitrogen with a slightly positive pressure. Unless otherwise noted, all starting materials were commercially available and were used without further purification. THF was refluxed and distilled from sodium benzophenone ketyl under a nitrogen atmosphere. Diethyl chlorophosphate was prepared by the reaction of phosphorus oxychloride and ethanol. EtMgBr was prepared by the reaction of freshed magnesium and ethyl bromide in distilled ether. 1H NMR and 13 C NMR spectra were recorded on Joel 300 NMR spectrometer. 31P NMR spectra were recorded on Bruker 200 NMR spectrometer. GC analysis was performed on gas chromatograph equipped with a flame ionization detector using a capillary column. GC yields were determined using suitable hydrocarbons as internal standards.

**A Procedure for the Reaction of Diethylzirconocen with Chlorophosphate – Preparation of Zircono-ethylphosphonate:** To a solution of diethylzirconocen, that is generated by the reaction of Cp2ZrCl2 with 2 equiv. of EtMgBr (2.4 ml, 1M in ether solution) in THF was added one equiv. of diethyl chlorophosphate (144.6l). The reaction mixture was kept at room temperature for 24 hours. 1H NMR(C6D6-THF, Me4Si)  1.14 (t, *J* = 6.9 Hz, 3H), 1.19-1.22 (m, 5H) (CH2-Zr, CH3), 1.68-1.89 (m, 2H), 4.06-4.16 (m, 4H), 5.98 (s,10H) (Cp); 13C NMR(C6D6-THF, Me4Si)  16.12, 16.55, 19.24, 22.98, 32.15(CH2-Zr), 64.02, 113.16(Cp); 31P NMR  34.7. Mass calcd for C16H24PO3Zr 385.0504, found 385.1003.

**Preparation of Ethylphosphonate:** The reaction mixture of zircono-ethylphosphonate was quenched with 2N HCl solution and then extracted with ethyl acetate. The extract was washed with water and brine and dried over MgSO4. The solvent was evaporated in vacuo to give a light yellow liquid. Chromatography using a mixture of ethyl acetate and petroleum ether (2:1) as elute provided the product as a colorless liquid 104.6mg (Isolated yield 63%, GC yield 87%). 1H NMR(CDCl3, Me4Si)  0.99 (t, *J* = 7.8 Hz, 3H), 1.19 (t, *J* = 6.9 Hz, 6H), 1.64 (q, *J* = 7.8 Hz, 2H), 3.93-3.99 (m, 4H); 13C NMR(CDCl3, Me4Si) 6.30, 16.16, 16.23, 17.62, 19.51, 61.20; 31P NMR  34.7.

**Preparation of 2-iodoethylphosphonate:** To the reaction mixture of zircono-ethylphosphonate was added 1.2 equiv. of I2 (305 mg) and the reaction mixture was stirred at room temperature for 3 hours. The above reaction mixture was quenched with 2N HCl, and stirred at room temperature for one hour and then extracted with ethyl acetate. The extract was washed with water and brine and dried over MgSO4. The solvent was evaporated in vacuo to a light brown liquid. Chromatography using a mixture of ethyl acetate and petroleum ether (2:1) as elute provided the product as a colorless liquid 175.2mg (Isolated yield 60%, GC yield 85%). 1H NMR(CDCl3, Me4Si)  1.29 (t, *J* = 6.9 Hz, 6H), 1.99 (t, *J* = 6.8 Hz, 2H), 3.23 (t, *J* = 7.9 Hz, 2H), 4.05-4.10(m, 4H); 13C NMR(CDCl3, Me4Si) ; 31P NMR  36.2.

**Preparation of 2-bromoethylphosphonate**: To the reaction mixture of zircono-ethylphosphonate was added 1.2 equiv. of NBS (204 mg) and the reaction mixture was stirred at room temperature for 3 hours. The above reaction mixture was quenched with 2N HCl, and stirred at room temperature for one hour and then extracted with ethyl acetate. The extract was washed with water and brine and dried over MgSO4. The solvent was evaporated in vacuo to a light brown liquid. Chromatography using a mixture of ethyl acetate and petroleum ether (2:1) as elute provided the product as a colorless liquid 120 mg (Isolated yield 49 %, GC yield 73 %). 1H NMR(CDCl3, Me4Si)  1.18 (t, *J* = 7.1 Hz, 6H), 2.01 (t, *J* = 6.9 Hz, 2H), 3.34 (t, *J* = 7.8 Hz, 2H), 4.10-4.13 (m, 4H); 13C NMR(CDCl3, Me4Si)  31P NMR  26.8.

**Preparation of 4-pentenphosphonate:** To the reaction mixture of zircono-ethylphosphonate was added 1.2 equiv. of allyl bromide (105 ml) and the reaction mixture was stirred at room temperature for 6 hours. The above reaction mixture was quenched with 2N HCl, and stirred at room temperature for one hour and then extracted with ethyl acetate. The extract was washed with water and brine and dried over MgSO4. The solvent was evaporated in vacuo to a light brown liquid. Chromatography using a mixture of ethyl acetate and petroleum ether (2:1) as elute provided the product as a colorless liquid 115.4 mg (Isolated yield 56 %, GC yield 77 %). 1H NMR(CDCl3, Me4Si)  1.19 (m, 2H), 1.28 (t, *J* = 6.9 Hz, 6H), 1.63 (m, 4H), 4.06 (m, 4H), 4.99 (m, 2H), 5.6 (m, 1H); 13C NMR(CDCl3, Me4Si) ; 31P NMR  32.7.

**Preparation of 3-butan-one-phosphonate:** To the reaction mixture of zircono-ethylphosphonate was added 1.2 equiv. of CuCl (119 mg) and 1.2 equiv. of acetyl chloride (85 l) and the reaction mixture was warmed up to 50 oC for 6 hours. The above reaction mixture was quenched with 2N HCl, and stirred at room temperature for one hour and then extracted with ethyl acetate. The extract was washed with water and brine and dried over MgSO4. The solvent was evaporated in vacuo to a light brown liquid. Chromatography using a mixture of ethyl acetate and petroleum ether (2:1) as elute provided the product as a colorless liquid 93.6 mg (Isolated yield 45 %, GC yield 67 %). 1H NMR(CDCl3, Me4Si)  1.24 (t, *J* = 7.3 Hz, 6H), 1.68(t, *J* = 7.1 Hz, 2H), 2.05 (t, *J* = 6.9 Hz, 2H), 2.13 (s, 3H), 4.18 (m, 4H); 13C NMR(CDCl3, Me4Si)  31P NMR  35.5.
